# Supplementary material
Source: publisher figshare collection journal article supplement (https://acs.figshare.com/ndownloader/files/5189029)
Supplement: Supplementary file 1 [file 5189029]

## The Brønsted Acid-Catalyzed Direct Aza-Darzens Synthesis of *N*-Alkyl *cis*-Aziridines

Amie L. Williams and Jeffrey N. Johnston\*

Department of Chemistry, Indiana University, Bloomington, IN 47405-7102

### General Experimental Details

Flame-dried (under vacuum) glassware was used for all non-aqueous reactions. All reagents and solvents were commercial grade and purified prior to use when necessary. Diethyl ether (Et<sub>2</sub>O), tetrahydrofuran (THF), dichloromethane (CH<sub>2</sub>Cl<sub>2</sub>), and benzene (C<sub>6</sub>H<sub>6</sub>) were dried by passage through a column of activated alumina as described by Grubbs.<sup>1</sup> Benzene was additionally passed through a column containing activated Q-5 reactant. Solvents other than benzene were degassed using the freeze-pump-thaw method when necessary. All additional solvents were dried by distillation from calcium hydride or Na/benzophenone (hydrocarbon deuterated solvents) when necessary. Magnesium sulfate was used to dry organic solutions unless otherwise noted. Preparation and analytical data has been previously reported for **2c**, **2d**, **2e**.<sup>2</sup>

Thin layer chromatography (TLC) was performed using glass-backed silica gel (250 μ) plates, and flash chromatography utilized 230–400 mesh silica gel from Scientific Adsorbents. Products were visualized by UV light, iodine, and/or the use of ceric ammonium molybdate, potassium permanganate, ninhydrin, *p*-anisaldehyde, and potassium iodoplatinate solutions.

IR spectra were recorded on a Nicolet Avatar 360 spectrophotometer. Liquids and oils were analyzed as neat films on a salt plate (transmission), whereas solids were applied to a diamond plate (ATR). Nuclear magnetic resonance spectra (NMR) were acquired on either a Varian Inova-400 or VXR-400 instrument. Chemical shifts are measured relative to tetramethylsilane, as judged by the residual partially deuterated solvent peak. Aziridine relative stereochemical

<sup>1</sup> Pangborn, A. B.; Giardello, M. A.; Grubbs, R. H.; Rosen, R. K.; Timmers, F. J. *Organometallics* **1996**, *15*, 1518–1520.

<sup>2</sup> Antilla, J. C.; Wulff, W.D. *Angew. Chem. Int. Ed.* **2000**, *39*, 4518–4521.

assignments were made on the basis of coupling constants typical for *cis*- and *trans*-aziridines. Mass spectra were obtained using a Kratos MS-80 spectrometer using the ionization technique indicated. Combustion analyses were performed by Atlantic Microlab, Norcross, GA.

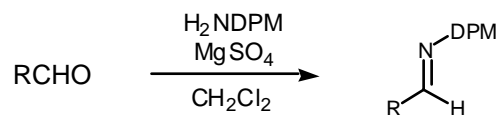

### General Procedure for Aldimine Condensations

To a diethyl ether or dichloromethane solution of the aldehyde (0.5 M) and  $\text{MgSO}_4$  or 4 Å MS (1:1 w/w) at 0 °C was added the amine (0.5 M). The solution was allowed to warm to 25 °C and stirred until complete conversion was achieved, as evidenced by  $^1\text{H}$  NMR. The mixture was filtered and washed with  $\text{Et}_2\text{O}$ . The solvent was removed *in vacuo* to give the analytically pure aldimine, which was used without further purification.

### General Procedure for Acid Catalyzed Aziridinations

To a propionitrile solution of the aldimine (0.3M) at –78 °C, was added triflic acid (0.25 equiv). After 5 min, ethyl diazoacetate (1.2 equiv) was added dropwise to the cold solution. The mixture was stirred at –78 °C for 6 h, and then quenched by the addition of a saturated sodium bicarbonate solution. The layers were separated, and the aqueous layer extracted with ethyl acetate. The combined organic layers were dried over  $\text{Na}_2\text{SO}_4$ , filtered, and concentrated to give the crude product, which was analyzed by  $^1\text{H}$  NMR to determine the ratio of diastereomers. Flash chromatography or recrystallization of the crude mixture provided the analytically pure aziridine.

**Benzhydrylimino-acetic acid methyl ester (2a).** Following the general procedure, oxo-acetic acid methyl ester (2.88 g, 32 mmol) and 4 Å MS were stirred in dichloromethane (10 mL) and cooled to 0 °C, then diphenylmethyl amine (5.65 mL, 32 mmol) was added dropwise to the cold mixture. The mixture was allowed to warm to 25 °C and stirred until  $^1\text{H}$  NMR spectroscopy revealed complete aldimine formation. Filtering of the mixture, and removal of the solvent afforded 7.55 g (93%) of the aldimine as white solid. IR (film) 3085, 3061, 3027, 2950, 2849, 1751, 1728, 1494, 1453, 1300, 1211, 1030  $\text{cm}^{-1}$ ;  $^1\text{H}$  NMR (400 MHz,  $\text{CDCl}_3$ ) 7.74 (s, 1H), 7.30–7.19 (m, 10H), 5.63 (s, 1H), 3.82 (s, 3H);  $^{13}\text{C}$  NMR (100 MHz,  $\text{CDCl}_3$ ) 163.8, 153.4, 141.6,

141.6, 128.8, 128.8, 127.9, 127.9, 127.5, 127.5, 77.6, 52.8; HRMS (EI): Exact mass calcd for  $C_{16}H_{14}NO_2$   $[M-H]^+$  252.1025. Found 252.1021.

**Benzhydrylimino-acetic acid *tert*-butyl ester (2b).** Following the general procedure, oxo-acetic acid *tert*-butyl ester (4.01 g, 30.7 mmol) and  $MgSO_4$  were stirred in dichloromethane (30 mL) and cooled to 0 °C, then diphenylmethyl amine (5.03 mL, 29.1 mmol) was added dropwise to the cold mixture. The mixture was allowed to warm to 25 °C and stirred until  $^1H$  NMR spectroscopy revealed complete aldimine formation. Filtering of the mixture, and removal of the solvent afforded 8.5 g (99%) of the aldimine as white solid. IR (film) 3079, 3058, 3034, 2971, 2942, 1862, 1735, 1374, 1234  $cm^{-1}$ ;  $^1H$  NMR (400 MHz,  $CDCl_3$ ) 7.65 (s, 1H), 7.28-7.18 (m, 10H), 5.58 (s, 1H), 1.48 (s, 9H);  $^{13}C$  NMR (100 MHz,  $CDCl_3$ ) 162.2, 155.1, 142.1, 142.1, 128.7, 128.7, 127.9, 127.9, 127.5, 127.5, 82.7, 77.5, 28.1; HRMS (EI): Exact mass calcd  $C_{15}H_{12}NO_2$   $[M-C_4H_9]^+$  238.0868. Found 238.0866.

**Benzhydrylpyridin-2-ylmethylene amine (2f).** Following the general procedure, pyridine-2-carboxaldehyde (0.501 g, 4.67 mmol) and  $MgSO_4$  were stirred in dichloromethane (10 mL) and cooled to 0 °C, then diphenylmethyl amine (0.80 mL, 4.67 mmol) was added dropwise to the cold mixture. The mixture was allowed to warm to 25 °C and stirred until  $^1H$  NMR spectroscopy revealed complete aldimine formation. Filtering of the mixture, and removal of the solvent afforded 1.26 g (99%) of the aldimine as yellow solid. IR (film) 3081, 3048, 3022, 2077, 2868, 1644, 1584, 1493, 1447, 1365, 1274, 1025, 991  $cm^{-1}$ ;  $^1H$  NMR (400 MHz,  $CDCl_3$ )  $\delta$  8.62 (d,  $J$  = 4.8 Hz, 1H), 8.53 (s, 1H), 8.22 (d,  $J$  = 8.1 Hz, 1H), 7.72 (dd,  $J$  = 8.3, 7.5 Hz, 1H), 7.40 (d,  $J$  = 7.5 Hz, 4H), 7.33 (dd,  $J$  = 7.5, 7.5 Hz, 4H), 7.29-7.22 (m, 3H), 5.71 (s, 1H);  $^{13}C$  NMR (100 MHz,  $CDCl_3$ ) 162.0, 154.8, 149.4, 143.4, 143.4, 136.5, 128.6, 128.6, 127.8, 127.8, 127.2, 127.2, 124.9, 121.6, 77.7; HRMS (CI): Exact mass calcd for  $C_{19}H_{16}N_2$   $[M]^+$  272.1313. Found 272.1304.

**Benzhydryl-cyclopropylmethylene-amine (2g).** Following the general procedure, cyclopropane carboxaldehyde (0.50 mL, 6.69 mmol) and  $MgSO_4$  were stirred in dichloromethane (10 mL) and cooled to 0 °C, then diphenylmethyl amine (1.15 mL, 6.69 mmol) was added dropwise to the cold mixture. The mixture was allowed to warm to 25 °C and stirred until  $^1H$  NMR spectroscopy

revealed complete aldimine formation. Filtering of the mixture, and removal of the solvent afforded 1.52 g (97%) of the aldimine as yellow oil. IR (film) 3084, 3060, 3025, 3005, 2829, 1661, 1493, 1453, 1029  $\text{cm}^{-1}$ ;  $^1\text{H}$  NMR (400 MHz,  $\text{CDCl}_3$ )  $\delta$  7.33-7.25 (m, 8H), 7.24 -7.20 (m, 2H), 7.17 (d,  $J$  = 7.8 Hz, 1H), 5.32 (s, 1H), 1.83 (dddd,  $J$  = 12.6, 7.8, 7.8, 4.6 Hz, 1H), 0.91 (ddd,  $J$  = 7.2, 7.2, 4.3 Hz, 2 H), 0.73 (ddd,  $J$  = 7.0, 7.0, 4.3 Hz, 2H);  $^{13}\text{C}$  NMR (100 MHz,  $\text{CDCl}_3$ ) 167.7, 143.9, 143.9, 128.5, 128.5, 127.7, 127.7, 126.9, 126.9, 77.9, 16.6, 6.4, 6.4; HRMS (EI): Exact mass calcd for  $\text{C}_{17}\text{H}_{17}\text{N}$   $[\text{M}]^+$  235.1361. Found 235.1360.

**4-Benzhydrylimino-but-2-enoic acid ethyl ester (2g).** Following the general procedure, 4-oxo-but-2-enoic acid ethyl ester (0.401 g, 3.13 mmol) and  $\text{MgSO}_4$  were stirred in dichloromethane (10 mL) and cooled to 0  $^\circ\text{C}$ , then diphenylmethyl amine (0.54 mL, 3.13 mmol) was added dropwise to the cold mixture. The mixture was allowed to warm to 25  $^\circ\text{C}$  and stirred until  $^1\text{H}$  NMR spectroscopy revealed complete aldimine formation. Filtering of the mixture, and removal of the solvent afforded 0.89 g (97%) of the aldimine as yellow oil. IR (film) 3085, 3062, 3027, 2981, 2937, 2904, 2871, 1722, 1716, 1616, 1493, 1453, 1305, 1258, 1187, 1030  $\text{cm}^{-1}$ ;  $^1\text{H}$  NMR (400 MHz,  $\text{CDCl}_3$ )  $\delta$  8.17 (d,  $J$  = 9.0 Hz, 1H), 7.47 (dd,  $J$  = 15.8, 9.0 Hz, 1H), 7.35-7.27 (m, 10 H), 6.30 (d,  $J$  = 15.8 Hz, 1H), 5.53 (s, 1H), 4.26 (ddd,  $J$  = 7.1, 7.1, 7.1 Hz, 2H), 1.33 (dd,  $J$  = 7.1, 7.1 Hz, 3H);  $^{13}\text{C}$  NMR (100 MHz,  $\text{CDCl}_3$ ) 165.7, 160.5, 142.9, 142.5, 142.5, 130.8, 128.6, 128.5, 128.4, 127.7, 127.6, 127.3, 78.4, 60.9, 14.2; HRMS (EI): Exact mass calcd for  $\text{C}_{19}\text{H}_{19}\text{NO}_2$   $[\text{M}]^+$  293.1416. Found 293.1424.

**Benzhydryl-(2,2-dimethyl-[1,3]dioxolan-4-ylmethylene)-amine (2i).** Following the general procedure, 2,2-dimethyl-[1,3]dioxolane-4-carbaldehyde (1.04 g, 7.96 mmol) and 4 Å MS were stirred in diethyl ether (10 mL) and cooled to 0  $^\circ\text{C}$ , then diphenylmethyl amine (1.14 mL, 6.64 mmol) was added dropwise to the cold mixture. The mixture was allowed to warm to 25  $^\circ\text{C}$  and stirred until  $^1\text{H}$  NMR spectroscopy revealed complete aldimine formation. Filtering of the mixture through Celite, and removal of the solvent afforded 1.90 g (81%) of the aldimine as viscous clear oil. IR (film) 3086, 3062, 3027, 2986, 2935, 2870, 1669, 1494, 1380, 1371, 1215, 1062, 1030  $\text{cm}^{-1}$ ;  $^1\text{H}$  NMR (400 MHz,  $\text{CDCl}_3$ )  $\delta$  7.78 (d,  $J$  = 4.8 Hz, 1H), 7.29-7.17 (m, 10 H),

5.40 (s, 1H), 4.68 (ddd,  $J = 6.4, 6.4, 6.4$  Hz, 1H), 4.19 (dd,  $J = 8.5, 6.9$  Hz, 1H), 3.97 (dd,  $J = 8.5, 6.0$  Hz, 1H), 1.39 (s, 3H), 1.37 (s, 3H);  $^{13}\text{C}$  NMR (100 MHz,  $\text{CDCl}_3$ ) 163.3, 142.8, 142.7, 128.3, 128.1, 127.4, 127.2, 126.92, 126.89, 110.0, 77.2, 76.8, 67.2, 26.3, 25.2; HRMS (EI): Exact mass calcd for  $\text{C}_{19}\text{H}_{21}\text{NO}_2$   $[\text{M}]^+$  295.1572. Found 295.1572.

**1-Benzhydrylaziridine-2,3-dicarboxylic acid 2-ethyl ester 3-methyl ester (4a).** Following the general procedure, benzhydryliminoacetic acid methyl ester (**2a**) (0.110 g, 0.395 mmol) and triflic acid (11  $\mu\text{L}$ , 98.7  $\mu\text{mol}$ ) were stirred in propionitrile (1.3 mL) at  $-78^\circ\text{C}$ , then ethyl diazoacetate (51  $\mu\text{L}$ , 0.478 mmol) was added dropwise to the cold solution. After stirring at  $-78^\circ\text{C}$  for 6 h, the reaction was quenched by the addition of a saturated sodium bicarbonate solution and the reaction worked up according to the general procedure. Purification by column chromatography on silica gel (10-30 % ethyl acetate/hexanes) afforded 115 mg (86%) of **4a** as a white solid.  $R_f = 0.11$  (10% ethyl acetate/hexanes); IR (film) 3086, 3062, 2987, 2952, 1751, 1752, 1457, 1450, 1223, 1172, 1072  $\text{cm}^{-1}$ ;  $^1\text{H}$  NMR (400 MHz,  $\text{CDCl}_3$ )  $\delta$  7.755-7.52 (m, 4H), 7.33 (dd,  $J = 15.6, 15.6$  Hz, 4H), 7.25 (dd,  $J = 7.5, 7.1$  Hz, 2H), 4.20 (dddd,  $J = 17.9, 17.9, 10.7, 7.1$  Hz, 2H), 3.88 (s, 1H), 3.73 (s, 3H), 2.71 (d,  $J = 6.7$  Hz, 1H), 2.69 (d,  $J = 6.7$  Hz, 1H), 1.26 (t,  $J = 7.1$  Hz, 3H);  $^{13}\text{C}$  NMR (100 MHz,  $\text{CDCl}_3$ ) 167.7, 167.1, 141.5, 141.5, 128.6, 128.5, 127.6, 127.5, 127.4, 127.4, 77.1, 61.4, 52.4, 43.9, 14.1; HRMS (EI): Exact mass calcd for  $\text{C}_{20}\text{H}_{20}\text{NO}_4$   $[\text{M}-\text{H}]^+$  338.1392. Found 338.1393. *Anal.* Calcd. for  $\text{C}_{20}\text{H}_{21}\text{NO}_4$ : C, 70.78; H, 6.24; N, 4.13. Found C, 71.03; H, 6.22; N, 4.14.

**1-Benzhydrylaziridine-2,3-dicarboxylic acid 2- $t$ -butyl ester 3-ethyl ester (4b).** Following the general procedure, benzhydryliminoacetic acid  $t$ -butyl ester (**2b**) (0.110 g, 0.338 mmol) and triflic acid (10  $\mu\text{L}$ , 84.6  $\mu\text{mol}$ ) were stirred in propionitrile (1.1 mL) at  $-78^\circ\text{C}$ , then ethyl diazoacetate (44  $\mu\text{L}$ , 0.406 mmol) was added dropwise to the cold solution. After stirring at  $-78^\circ\text{C}$  for 6 h, the reaction was quenched by the addition of a saturated sodium bicarbonate solution and the reaction worked up according to the general procedure. Purification by column chromatography on silica gel (10-30 % ethyl acetate/hexanes) afforded 115 mg (89%) of **4b** as a white solid.  $R_f = 0.22$  (10% ethyl acetate/hexanes); IR (film) 3064, 3030, 2980, 2934, 1743, 1733, 1455, 1368,

1236, 1200, 1155, 1101  $\text{cm}^{-1}$ ;  $^1\text{H}$  NMR (400 MHz,  $\text{CDCl}_3$ )  $\delta$  7.56-7.54 (m, 4H), 7.32 (ddd,  $J$  = 7.1, 7.1, 2.0 Hz, 4H), 7.26-7.23 (m, 2H), 4.27-4.12 (m, 2H), 3.85 (s, 1H), 2.61 (d,  $J$  = 6.6 Hz, 1H), 2.57 (d,  $J$  = 6.8 Hz, 1H), 1.46 (s, 9H), 1.27 (t,  $J$  = 7.1 Hz, 3H);  $^{13}\text{C}$  NMR (100 MHz,  $\text{CDCl}_3$ ) 167.4, 166.2, 141.9, 141.9, 128.6, 128.5, 127.6, 127.6, 127.5, 127.5, 81.9, 76.9, 61.3, 44.7, 43.7, 28.0, 14.2; HRMS (EI): Exact mass calcd for  $\text{C}_{19}\text{H}_{18}\text{NO}_4$   $[\text{M}-\text{C}_4\text{H}_9]^+$  324.1236. Found 324.1232. *Anal.* Calcd. for  $\text{C}_{23}\text{H}_{27}\text{NO}_4$ : C, 72.42; H, 7.13; N, 3.67. Found C, 72.38; H, 7.13; N, 3.77.

**1-Benzhydryl-3-cyclohexyl-aziridine-2-carboxylic acid ethyl ester (4c).** Following the general procedure benzhydryl-cyclohexylidene-amine (**2c**) (0.204 mg, 0.735 mmol) and triflic acid (21  $\mu\text{L}$ , 0.184 mmol) were stirred in propionitrile (2.5 mL) at 25  $^\circ\text{C}$ , then ethyl diazoacetate (95.0  $\mu\text{L}$ , 0.882 mmol) was added dropwise to the cold solution. After stirring at 25  $^\circ\text{C}$  for 6 h, the reaction was quenched by the addition of a saturated sodium bicarbonate solution and the reaction worked up according to the general procedure.  $^1\text{H}$  NMR Analysis of the crude reaction mixture showed a 1:2:12 ratio of enamide:*trans*-aziridine:*cis*-aziridine. Purification by column chromatography on silica gel (3-5-20% ether/hexanes) afforded 0.113 g (42%) of **4c** as a white solid.  $^1\text{H}$  NMR data was consistent with that reported previously.<sup>2</sup>

**1-Benzhydryl-3-tert-butyl-aziridine-2-carboxylic acid ethyl ester (4d).** Following the general procedure, benzhydryl-(2,2-dimethyl-propylidene)-amine (**2d**) (0.201 g, 0.796 mmol) and triflic acid (22  $\mu\text{L}$ , 0.19 mmol) were stirred in propionitrile (2.5 mL) at 25  $^\circ\text{C}$ , then ethyl diazoacetate (0.103 mL, 0.955 mmol) was added dropwise to the cold solution. After stirring at 25  $^\circ\text{C}$  for 6 h, the reaction was quenched by the addition of a saturated sodium bicarbonate solution and the reaction worked up according to the general procedure.  $^1\text{H}$  NMR Analysis of the crude reaction mixture showed a 1:5:7.5 ratio of enamide:*trans*-aziridine:*cis*-aziridine. Purification by column chromatography on silica gel (3-5-20% ether/hexanes) afforded 0.121 g (45%) of **4d** as a white solid.  $^1\text{H}$  NMR data matched the analytical data reported in the literature.

**1-Benzhydryl-3-phenylaziridine-2-carboxylic acid ethyl ester (4e).** Following the general procedure, benzhydrylbenzylidene-amine (**2e**) (0.201 g, 0.736 mmol) and triflic acid (21  $\mu\text{L}$ ,

0.184 mmol) were stirred in propionitrile (2.5 mL) at 0 °C, then ethyl diazoacetate (95 µL, 0.884 mmol) was added dropwise to the cold solution. After stirring at 0 °C for 6 h, the reaction was quenched by the addition of a saturated sodium bicarbonate solution and the reaction worked up according to the general procedure. <sup>1</sup>H NMR Analysis of the crude reaction mixture showed a 2:1:4.5 ratio of enamide:*trans*-aziridine:*cis*-aziridine. Purification by column chromatography on silica gel (10-30 % ethyl acetate/hexanes) afforded 122 mg (42%) of **4e** as a white solid. <sup>1</sup>H NMR data matched the analytical data reported in the literature.

**1-Benzhydryl-3-pyridin-2-yl-aziridine-2-carboxylic acid ethyl ester (4f).** Following the general procedure, Benzhydryl-pyridin-2-ylmethylene-amine (**2f**) (0.101 g, 0.367 mmol) and triflic acid (10 µL, 91.8 µmol) were stirred in propionitrile (1.2 mL) at 0°C, then ethyl diazoacetate (47 µL, 0.440 mmol) was added dropwise to the cold solution. After stirring at -78 °C for 6 h, the reaction was quenched by the addition of a saturated sodium bicarbonate solution and the reaction worked up according to the general procedure. Purification by column chromatography on silica gel (10-20-40 % ether/hexanes) afforded 96 mg (73%) of **4f** as a white foam. *R<sub>f</sub>* = 0.06 (20% ether/hexanes). IR (film) 3062, 3027, 2981, 2937, 1743, 1590, 1454, 1436, 1209, 1182, 1068 cm<sup>-1</sup>; <sup>1</sup>H NMR (400 MHz, CDCl<sub>3</sub>) δ 8.45 (dd, *J* = 4.9, 4.8 Hz, 1H), 7.65-7.60 (m, 4H), 7.49 (d, *J* = 7.7 Hz, 2H), 7.36 (dd, *J* = 7.7, 7.4 Hz, 2H), 7.29-7.26 (m, 3H), 7.25-7.12 (m, 2H), 4.03 (s, 1H), 3.97 (ddd, *J* = 7.1, 7.1, 7.1 Hz, 2H), 3.42 (d, *J* = 6.8 Hz, 1H), 2.80 (d, *J* = 6.8 Hz, 1H), 1.03 (dd, *J* = 7.1, 7.1 Hz, 3H); <sup>13</sup>C NMR (100 MHz, CDCl<sub>3</sub>) 167.6, 155.2, 148.7, 142.4, 142.2, 136.1, 128.6, 128.6, 127.6, 127.5, 127.3, 127.2, 122.8, 122.5, 77.5, 60.8, 49.3, 46.1, 14.0; HRMS (EI): Exact mass calcd for C<sub>23</sub>H<sub>22</sub>N<sub>2</sub>O<sub>2</sub> [M]<sup>+</sup> 358.1681. Found 358.1676.

*Anal.* Calcd. for C<sub>23</sub>H<sub>22</sub>N<sub>2</sub>O<sub>2</sub>: C, 77.07; H, 6.19; N, 7.82. Found C, 76.95; H, 6.09; N, 7.77.

**1-Benzhydryl-3-cyclopropyl-aziridine-2-carboxylic acid ethyl ester (4g).** Following the general procedure, benzhydryl-cyclopropylmethylene-amine (**2g**) (0.250 g, 1.06 mmol) and triflic acid (30 µL, 0.26 mmol) were stirred in propionitrile (3.5 mL) at 25 °C, then ethyl



diazoacetate (0.137  $\mu$ L, 1.28 mmol) was added dropwise to the cold solution. After stirring at 25 °C for 6 h, the reaction was quenched by the addition of a saturated sodium bicarbonate solution and the reaction worked up according to the general procedure. Purification by column chromatography on silica gel (5-15% ethyl acetate/hexanes) afforded 0.136 g (40%) of **4g** as a white solid.  $R_f$  = 0.34 (10% ethyl acetate/hexanes). IR (film) 3085, 3063, 3027, 2982, 2826, 1744, 1453, 1300, 1189, 1030  $\text{cm}^{-1}$ ;  $^1\text{H}$  NMR (400 MHz,  $\text{CDCl}_3$ )  $\delta$  7.49 (d,  $J$  = 7.3 Hz, 2H), 7.37 (d,  $J$  = 7.3 Hz, 2H), 7.30-7.26 (m, 3H), 7.24-7.15 (m, 3H), 4.24-4.15 (m, 2H), 3.63 (s, 1H), 2.30 (d,  $J$  = 6.7 Hz, 1H), 1.62 (dd,  $J$  = 6.7, 6.7 Hz, 1H), 1.26 (dd,  $J$  = 7.0, 7.0 Hz, 3H), 0.98-0.89 (m, 1H), 0.44-0.33 (m, 2H), 0.17-0.01 (m, 1H), -0.01- -0.07 (m, 1H);  $^{13}\text{C}$  NMR (100 MHz,  $\text{CDCl}_3$ ) 169.5, 142.8, 142.5, 128.5, 128.4, 127.9, 127.5, 127.4, 127.2, 77.7, 60.9, 49.7, 43.8, 14.4, 8.5, 3.5, 3.1; HRMS (EI): Exact mass calcd for  $\text{C}_{21}\text{H}_{23}\text{NO}_2$   $[\text{M}]^+$  321.1729. Found 321.1726.

*Anal.* Calcd. for  $\text{C}_{21}\text{H}_{23}\text{NO}_2$ : C, 78.47; H, 7.21; N, 4.36. Found C, 78.44; H, 7.20; N, 4.37.

**1-Benzhydryl-3-(2-ethoxycarbonyl-vinyl)-aziridine-2-carboxylic acid ethyl ester (4h).**

Following the general procedure, 4-benzhydrylimino-but-2-enoic acid ethyl ester (**2h**) (50.1 mg, 0.170 mmol) and triflic acid (5  $\mu$ L, 42.6  $\mu$ mol) were stirred in propionitrile (0.60 mL) at -78 °C, then ethyl diazoacetate (22  $\mu$ L, 0.204 mmol) was added dropwise to the cold solution. After stirring at -78 °C for 6 h, the reaction was quenched by the addition of a saturated sodium bicarbonate solution and the reaction worked up according to the general procedure. Purification by column chromatography on silica gel (10-30-50% ethyl acetate/hexanes) afforded 35 mg (53%) of **4h** as a white solid.  $R_f$  = 0.19 (10% ethyl acetate/hexanes). IR (film) 3061, 3027, 2983, 2937, 2905, 1716, 1454, 1305, 1264, 1189  $\text{cm}^{-1}$ ;  $^1\text{H}$  NMR (400 MHz,  $\text{CDCl}_3$ )  $\delta$  7.48 (d,  $J$  = 7.3 Hz, 2H), 7.40 (d,  $J$  = 7.3 Hz, 2H), 7.43-7.21 (m, 6H), 6.92 (dd,  $J$  = 15.8, 7.1 Hz, 1H), 6.07 (d,  $J$  = 15.8 Hz, 1H), 4.20-4.15 (m, 4H), 3.85 (s, 1H), 2.70-2.65 (m, 2H), 1.27 (dd,  $J$  = 7.1, 7.1 Hz, 3H), 1.25 (dd,  $J$  = 7.1, 7.1 Hz, 3H);  $^{13}\text{C}$  NMR (100 MHz,  $\text{CDCl}_3$ ) 168.0, 165.7, 142.5, 142.1, 142.0,

128.7, 128.7, 127.6, 127.5, 127.4, 127.3, 125.1, 77.4, 61.3, 60.5, 46.0, 45.9, 14.3, 14.3; HRMS (EI): Exact mass calcd for  $C_{23}H_{25}NO_4$   $[M]^+$  379.1784. Found 379.1778.

*Anal.* Calcd. for  $C_{23}H_{25}NO_4$ : C, 72.80; H, 6.64; N, 3.69. Found C, 72.32; H, 6.62; N, 3.65.

**1-Benzhydryl-3-(2,2-dimethyl-[1,3]dioxolan-4-yl)-aziridine-2-carboxylic acid ethyl ester**

**(4i).** Following the general procedure, benzhydryl-(2,2-dimethyl-[1,3]dioxolan-4-ylmethylene) amine (**2i**) (0.203 g, 0.677 mmol) and triflic acid (19  $\mu$ L, 0.169 mmol) were stirred in propionitrile (2.2 mL) at  $-78^\circ\text{C}$ , then ethyl diazoacetate (87  $\mu$ L, 0.813 mmol) was added dropwise to the cold solution. After stirring at  $-78^\circ\text{C}$  for 6 h, the reaction was quenched by the addition of a saturated sodium bicarbonate solution and the reaction worked up according to the general procedure. Purification by column chromatography on silica gel (20-40-100 % ether/hexanes) afforded 214 mg (83%) of **4i** as a white solid.  $R_f = 0.21$  (20% ether/hexanes);  $[\alpha]_D^{25} = +89.1$  ( $c$  1.0,  $\text{CHCl}_3$ ); IR (film) 3090, 3055, 3027, 2985, 2936, 2886, 1730, 1456, 1368, 1195, 1066, 1029  $\text{cm}^{-1}$ ;  $^1\text{H}$  NMR (400 MHz,  $\text{CDCl}_3$ )  $\delta$  7.33 (d,  $J = 7.7$  Hz, 3H), 7.22-7.06 (m, 7H), 4.08 (ddd,  $J = 6.8, 6.8, 6.8$  Hz, 2H), 3.97 (ddd,  $J = 6.2, 6.2, 6.0$  Hz, 1H), 3.64 (dd,  $J = 8.4, 6.4$  Hz, 1H), 3.60 (s, 1H), 2.85 (dd,  $J = 8.4, 6.0$  Hz, 1H), 2.33 (d,  $J = 6.6$  Hz, 1H), 2.04 (dd,  $J = 6.9, 6.8$  Hz, 1H), 1.21 (s, 3H), 1.11 (t,  $J = 6.8$  Hz, 3H), 1.11 (s, 3H);  $^{13}\text{C}$  NMR (100 MHz,  $\text{CDCl}_3$ ) 168.8, 142.4, 141.9, 128.6, 128.5, 127.9, 127.9, 126.9, 126.9, 109.3, 77.3, 73.2, 67.9, 61.1, 47.5, 42.8, 26.8, 25.2, 14.2; HRMS (CI): Exact mass calcd for  $C_{23}H_{28}NO_4$   $[M+H]^+$  382.2018. Found 382.2018.

*Anal.* Calcd. for  $C_{23}H_{27}NO_4$ : C, 72.42; H, 7.13; N, 3.67. Found C, 72.01; H, 7.34; N, 3.51.

*Relative stereochemistry was assigned by X-ray diffraction.*<sup>3</sup>

<sup>3</sup> Pink, M.; Williams, A. L.; Johnston, J. N. unpublished work.
